# Supplementary material for: Synthesis of gradient copolymers by concurrent enzymatic monomer transformation and RAFT polymerization
Source: Royal Society of Chemistry journal article supplement (doi:10.1039/c3py00841j), 2013-01-01
Supplement: c3py00841j.pdf [file c3py00841j.pdf]

## Supporting Information

### Synthesis of gradient copolymers by concurrent enzymatic monomer transformation and RAFT polymerization

Changkui Fu, Bin Yang, Chongyu Zhu, Shiqi Wang, Yun Zhang, Yen Wei, Lei Tao\*

The Key Laboratory of Bioorganic Phosphorus Chemistry & Chemical Biology (Ministry of Education), Department of Chemistry, Tsinghua University, Beijing 100084, P. R. China.

E-mail: [leitao@mail.tsinghua.edu.cn](mailto:leitao@mail.tsinghua.edu.cn)

### Supporting Data

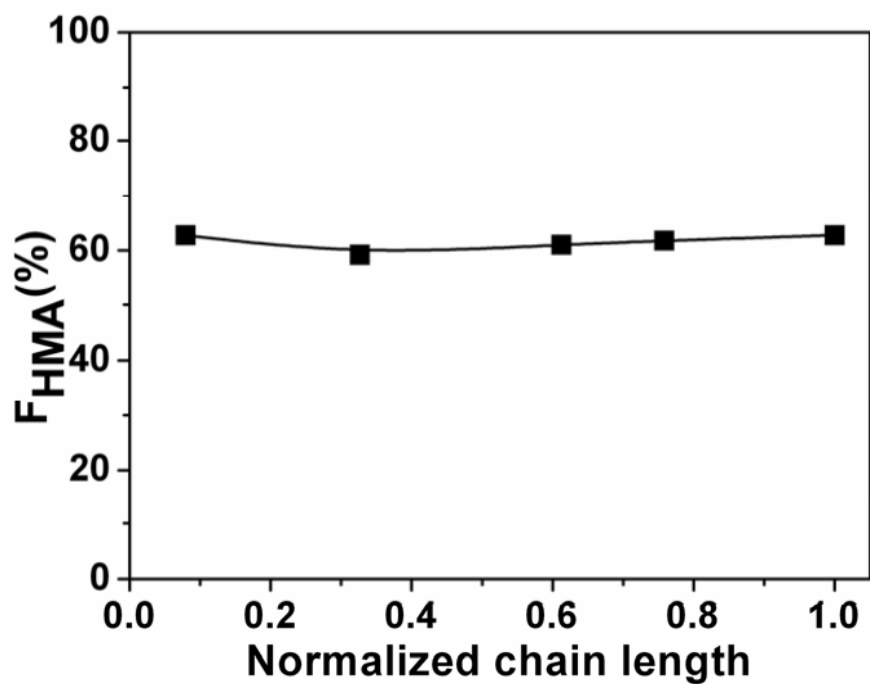

**SFig. 1.** Cumulative HMA mole fraction ( $F_{\text{HMA}}$ ) as a function of normalized chain length during random copolymerization of HMA and TFEMA.

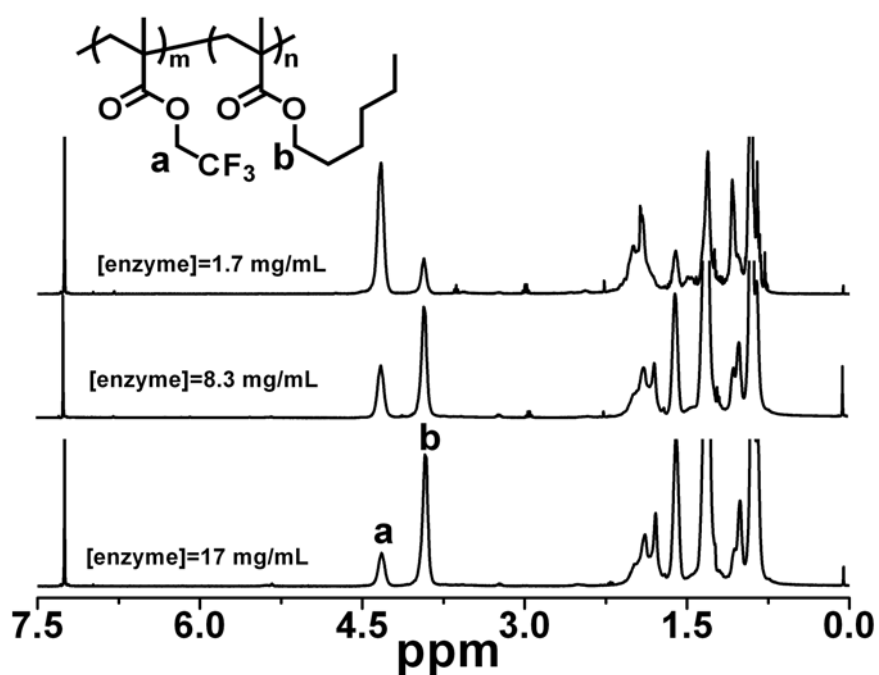

**SFig. 2.** <sup>1</sup>H NMR spectra (CDCl<sub>3</sub>) of gradient copolymers pHMA-g-pTFEMA catalyzed by different concentrations of enzyme after purification.

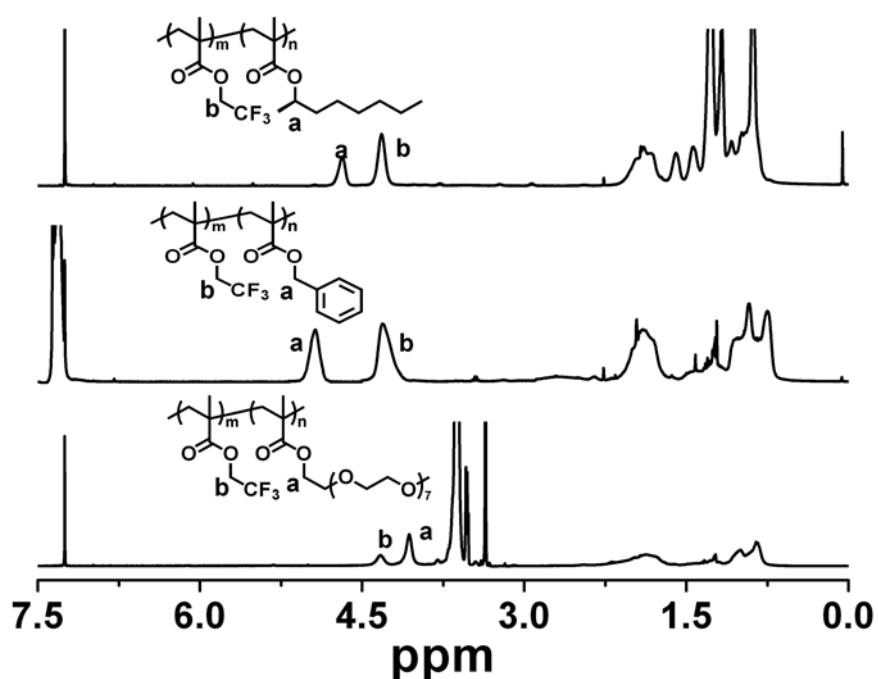

**SFig. 3.** <sup>1</sup>H NMR spectra (CDCl<sub>3</sub>) of gradient copolymers based on different alcohols after purification. [CETPA] = 12.5 mM; [ABVN] = 4.2 mM; [TFEMA]<sub>0</sub> = 1.0 M; [ROH]<sub>0</sub> = 1.0 M

(BzOH and mPEG) or 2.0 M (2-octanol); [TEA] = 1.0 M; [Novozym435] = 8.3 mg/mL in 6.0 mL of toluene at 55 °C.

**S**Tab. 1. Information of gradient and random copolymers

| polymer        | F <sub>RMA</sub> (%) | M <sub>n</sub> | PDI  | T <sub>g</sub> <sup>onset</sup> (°C) |
|----------------|----------------------|----------------|------|--------------------------------------|
| pTFEMA-g-pHMA  | 56                   | 12800          | 1.25 | 21.6                                 |
| pTFEMA-r-pHMA  | 60                   | 11500          | 1.39 | 39.1                                 |
| pTFEMA-g-pBzMA | 42                   | 8300           | 1.44 | 21.5                                 |
| pTFEMA-r-pBzMA | 50                   | 10600          | 1.22 | 80.0                                 |
| pTFEMA-g-pOMA  | 34                   | 12600          | 1.22 | 28.3                                 |
| pTFEMA-r-pOMA  | 50                   | 7800           | 1.32 | 34.3                                 |
